# Supplementary material for: Molecular cytogenetic characterization of chromosome site-specific repetitive sequences in the Arctic lamprey (Lethenteron camtschaticum, Petromyzontidae)
Source: PubMed Central journal article supplement — DNA Res. 2016 Dec 24;24(1):93–101. doi: 10.1093/dnares/dsw053 (PMC5381345; doi:10.1093/dnares/dsw053), 2016-12-24
Supplement: dsw053_Supp.pdf [file dsw053_Supp.pdf]

## 1 **Supplementary materials and methods**

### 2 *Molecular cloning of repetitive sequence*

3 High molecular weight genomic DNA was isolated from about 200 µl of heparinized blood  
4 using the phenol-chloroform extraction method. Molecular cloning of repetitive sequences was  
5 performed as described previously.<sup>1</sup> Five µg of genomic DNA was digested with 26 restriction  
6 enzymes (ApaI, BamHI, BglI, BglIII, DdeI, DraI, EcoRI, EcoRV, HaeII, HaeIII, HapII, HindIII,  
7 HinfI, HpaII, MspI, NcoI, NotI, PstI, PvuII, SacI, SalI, SmaI, SpeI, SphI, XbaI, and XhoI), and  
8 subjected to electrophoresis in a 1.2% agarose gel. The intense DNA bands of repetitive  
9 sequences were isolated from the gel, purified, and ligated into pBluescript SK(+) vector  
10 (Stratagene, La Jolla, CA, USA). The ligation mixture was used to transform *E. coli* XL1-Blue  
11 MRF (Agilent Technologies, Santa Clara, CA, USA). Nucleotide sequences of the DNA clones  
12 were determined using an ABI PRISM 3130 DNA sequencer (Thermo Fisher  
13 Scientific-Applied Biosystems, Carlsbad, CA, USA) after sequencing reactions with a Big  
14 Dye Terminator v3.1 Cycle Sequencing Kit (Thermo Fisher Scientific-Applied Biosystems).

15

### 16 *Fluorescence in situ hybridization (FISH)*

17 FISH analysis was performed as previously described.<sup>2</sup> The DNA fragments were labeled with  
18 biotin-16-dUTP or digoxigenin-11-dUTP using a nick translation kit (Roche Diagnostics, Basel,  
19 Switzerland). After hybridization, the slides were incubated with FITC-avidin (Thermo Fisher  
20 Scientific-Molecular Probes, Carlsbad, CA, USA) for biotin-labeled probes or with mouse  
21 monoclonal anti-digoxigenin clone DI-22 ascites fluid (Sigma-Aldrich, St. Louis, MO, USA)  
22 labeled with Cy3 using a Cy3 Ab labeling kit (GE Healthcare, Buckinghamshire, UK) for  
23 digoxigenin-labeled probes, and counterstained with DAPI (4',  
24 6-diamidino-2-phenylindole-dihydrochloride) or propidium iodide (PI). The digital FISH

25 images were captured with the 550CW-QFISH application program (Leica Microsystems  
26 Imaging Solution, Cambridge, UK) using a cooled CCD camera (Leica DFC360 FX, Leica  
27 Microsystems, Wetzlar, Germany) mounted on a Leica DMRA microscope.

28 Chromosomal location of the 18S-28S ribosomal RNA genes was determined using  
29 pHr21Ab (5.8-kb for the 5' portion) and pHr14E3 (7.3-kb for the 3' portion) fragments of  
30 human 45S pre-ribosomal RNA gene (*RNA45S*), which were provided by National Institutes of  
31 Biomedical Innovation, Health and Nutrition, Osaka. For mapping of telomeric repeats,  
32 (TTAGGG)<sub>7</sub> and (TAACCC)<sub>7</sub> repeated sequence probes were used. To detect active site of  
33 18S-28S rRNA genes, Ag-NOR staining was performed using the same chromosome slides  
34 used for FISH analysis of 18S-28S rRNA genes.<sup>3</sup> The 5S rDNA probe was amplified by PCR  
35 using genomic DNA of *Lethenteron camtschaticum*. A 96-bp fragment was amplified using the  
36 primers designed based on the 5S rDNA nucleotide sequences of this species (GenBank  
37 accession number D00076): 5'-acgaccatataccacctgaat-3' and 5'-ggcggctcctccaagta-3'. The  
38 PCR reaction started at 95 °C for 4 min before the reaction of 35 cycles of 95 °C for 1 min, 62  
39 °C for 1 min, and 72 °C for 1 min, and then followed by a single cycle reaction at 72 °C for 5  
40 min. The PCR products were subjected to electrophoresis in a 1.2% agarose gel and stained  
41 with ethidium bromide. PCR fragments were cloned into the pGEMT-easy vector (Promega,  
42 Madison, WI, USA) and sequenced.

43

#### 44 *Hybridization analysis of DNA blots*

45 For Southern blot hybridization, the genomic DNA (5 µg) was digested with restriction  
46 endonucleases, fractionated on a 1% agarose gel, and transferred onto nylon membranes  
47 (Roche Diagnostics). DNA probes were labeled with digoxigenin-11-dUTP using a PCR DIG  
48 Labeling Mix (Roche Diagnostics) and hybridized to the membrane at 45 °C overnight in DIG

49 Easy Hyb solution (Roche Diagnostics). After hybridization, the membranes were washed  
50 sequentially at 45 °C in 2 × SSC, 1 × SSC, 0.5 × SSC, and 0.1 × SSC, all of which contained  
51 0.1% SDS, for 15 min each. Chemiluminescent signals were detected with  
52 anti-digoxigenin-AP Fab fragments and CDP-Star (Roche Diagnostics) and exposed to Biomax  
53 MS-1 Autoradiography Film (Carestream Health, Rochester, NY, USA).

54 For slot-blot hybridization, genomic DNAs of the following species were extracted as  
55 previously documented<sup>4</sup> and used: Arctic lamprey (*Lethenteron camtschaticum*,  
56 Petromyzontidae), sea lamprey (*Petromyzon marinus*, Petromyzontidae), pouched lamprey  
57 (*Geotria australis*, Geotriidae), and southern lamprey (*Mordacia mordax*, Mordaciidae) of  
58 Petromyzontiformes, inshore hagfish (*Eptatretus burgeri*, Myxinidae, Myxiniformes), lesser  
59 spotted catshark (*Scyliorhinus canicula*, Scyliorhinidae, Carcharhiniformes), and medaka  
60 (*Oryzias latipes*, Adrianichthyidae, Beloniformes). Genomic DNA was denatured with 0.4N  
61 NaOH for 10 min and transferred onto nylon membranes using BIO-DOT SF blotting  
62 equipment (Bio-Rad, Hercules, CA, USA). DNA probes were labeled with  
63 digoxigenin-11-dUTP using a PCR DIG Labeling Mix (Roche Diagnostics) and hybridized to  
64 the membrane at 45 °C in DIG Easy Hyb solution. The luminescent signals were detected as  
65 described in Southern blot hybridization.

66

67 **References**

- 68 1. Uno, Y., Asada, Y., Nishida, C., Takehana, Y., Sakaizumi, M., and Matsuda, Y. 2013,  
69 Divergence of repetitive DNA sequences in the heterochromatin of medaka fishes:  
70 molecular cytogenetic characterization of constitutive heterochromatin in two medaka  
71 species: *Oryzias hubbsi* and *O. celebensis* (Adrianichthyidae, Beloniformes). *Cytogenet.*  
72 *Genome Res.*, **141**, 212–26.
- 73 2. Matsuda, Y. and Chapman, V.M. 1995, Application of fluorescence in situ hybridization in  
74 genome analysis of the mouse. *Electrophoresis*, **16**, 261–72.
- 75 3. Howell, W.M., Hsu, T.C., and Block, B.M. 1977, Visualization of centriole-bodies using  
76 silver stain. *Chromosoma*, **65**, 9–20.
- 77 4. Kuraku, S., Qiu, H., and Meyer, A. 2012, Horizontal transfers of Tc1 elements between  
78 teleost fishes and their vertebrate parasites, lampreys. *Genome Biol. and Evol.*, **4**, 929–36.
- 79 5. Kohany, O., Gentles, A.J., Hankus, L., and Jurka, J. 2006, Annotation, submission and  
80 screening of repetitive elements in Repbase: RepbaseSubmitter and Censor. *BMC*  
81 *Bioinformatics*, **25**, 474.
- 82 6. Caputo, V., Giovannotti, M., Cerioni, P.N., Splendiani, A., Tagliavini, J., and Olmo, E.  
83 2011, Chromosomal study of a lamprey (*Lampetra zanandreae* Vladykov, 1955)  
84 (Petromyzonida: Petromyzontiformes): conventional and FISH analysis. *Chromosome Res.*,  
85 **19**, 481–91.

**Supplementary Table S1.** The distribution of chromosome numbers in metaphase spreads of

*Lethenteron camtschaticum*.

| Number of chromosomes | 165 | 166 | 167 | 168                    | 169 | 170 | Total |
|-----------------------|-----|-----|-----|------------------------|-----|-----|-------|
| Number of cells       | 1   | 3   | 17  | 53 (65.4) <sup>a</sup> | 6   | 1   | 81    |

<sup>a</sup>% of cells with a modal diploid chromosome number

**Supplementary Table 2.** List of nucleotide sequences of integrase domains of Ty3/Gypsy families used for studying the phylogenetic relationship with the LCA-ApaI sequence

| Sequence name | Species name                                          | Common species name            | Accession number               |
|---------------|-------------------------------------------------------|--------------------------------|--------------------------------|
| Bartez        | <i>Tetraodon nigroviridis</i>                         | Spotted green pufferfish       | AJ621589                       |
| CER1          | <i>Caenorhabditis elegans</i>                         | Roundworm                      | U15406                         |
| Cigr2         | <i>Ciona intestinalis</i>                             | Yellow sea squirt              | JF357717                       |
| CRR1          | <i>Oryza sativa</i>                                   | Rice                           | M75723                         |
| Dreggl        | <i>Danio rerio</i>                                    | Zebrafish                      | CR547121                       |
| GYPSY         | <i>Drosophila melanogaster</i>                        | Fruit fly                      | P10401                         |
| Gypsy-26_PM-I | <i>Petromyzon marinus</i>                             | Sea lamprey                    | – <sup>a</sup>                 |
| HIV           | human immunodeficiency virus 1                        | Human immunodeficiency virus 1 | ADA71678                       |
| MAG           | <i>Bombyx mori</i>                                    | Domestic silkworm              | X17219                         |
| LCA-ApaI      | <i>Lethenteron camtschaticum</i>                      | Arctic lamprey                 | LC149811–LC149817 <sup>b</sup> |
| LReO3         | <i>Oryzias latipes</i>                                | Japanese medaka fish           | Q8UUM8                         |
| RSV           | Rous sarcoma virus                                    | Rous sarcoma virus             | FJ041197                       |
| Saci-2        | <i>Schistosoma mansoni</i>                            | Flatworm                       | BK004069                       |
| SURL          | <i>Tripneustes gratilla</i>                           | Hawaiian sea urchin            | M75723                         |
| Sushi-ichi    | <i>Takifugu rubripes</i>                              | Japanese pufferfish            | AF030881                       |
| TED           | <i>Autographa californica</i><br>nucleopolyhedrovirus | Nucleopolyhedrovirus           | M32662                         |
| Ty3           | <i>Saccharomyces cerevisiae</i>                       | Baker's yeast                  | Q7LHG5                         |

<sup>a</sup>Gypsy-26\_PM-I was taken from the Repbase (<http://www.girinst.org/repbase/>).<sup>5</sup>

<sup>b</sup>Seven LCA-ApaI fragments (LC149811–LC149817) isolated in this study.

### Supplementary figure legends

**Figure S1.** Chromosome distribution of the 18S-28S rRNA and 5S rRNA genes, Ag-NORs, and telomeric TTAGGG repeats in *Lethenteron camtschaticum*. **(A)** DAPI-stained metaphase spread hybridized with biotin-labeled 18S-28S rRNA probe. Asterisks show the hybridization signals. Arranged three chromosomal pairs with FISH signals in the same metaphase spread and their C-banded patterns in a different metaphase spread are shown in the inset. **(B)** Ag-NOR staining pattern of the same metaphase spread shown in **(A)**. Arrows indicate Ag-positive regions. Ag-NOR staining patterns of the three pairs of chromosomes with FISH signals of the 18S-28S probes in **(A)** are shown in the inset. **(C)** Enlarged photographs of chromosome pairs with Ag-stained NORs in three different individuals. **(D)** FISH pattern of biotin-labeled 5S rDNA probe on PI-stained chromosomes. The 5S rDNA signals were localized to a single pair of small chromosomes that are different from chromosomes with 18S-28S rRNA signals (data not shown). Asterisks show the hybridization signals. **(E)** FISH pattern of Cy3-labeled telomeric TTAGGG repeats on a DAPI-stained metaphase spread. Scale bars represent 10  $\mu\text{m}$ .

**Figure S2.** Ethidium bromide-stained gels of *Le. camtschaticum* genomic DNA digested with EcoRI **(A)** and ApaI **(B)**. Arrowheads indicate the prominent DNA bands which were used for molecular cloning of repetitive sequences. Phi X174 DNA-HaeIII digest and  $\phi$  X174 DNA-HincII digest were used as a molecular size marker in the left lane in **(A)** and **(B)**, respectively.

**Figure S3.** Alignments of the fragments of LCA-EcoRIa, LCA-EcoRIb and LCA-ApaI sequence families and their consensus nucleotide sequences. **(A)** LCA-EcoRIa. **(B)** LCA-EcoRIb. **(C)** LCA-ApaI. Dots indicate identity with nucleotides in the consensus sequence

at the top; hyphens indicate gaps. Restriction enzyme recognition sites are underlined: EcoRI (dot and dash), AluI (dot), ApaI (double), HpaII/MspI (bold), PstI (wavy). Numerals at the end of lines represent the sequence length.

**Figure S4.** Molecular phylogenetic trees of LCA-EcoRIb sequences and LCA-ApaI sequences.

(A) Molecular phylogenetic tree of LCA-EcoRIb and EcoRI satellite DNAs isolated from three lamprey species, *La. planeri*,<sup>6</sup> *La. zanandreaei*,<sup>6</sup> and *P. marinus* (X92515). (B) Molecular phylogenetic tree of integrase domains of the LCA-ApaI sequence and Ty3/Gypsy families of LTR retrotransposons. The nucleotide sequences used for this analysis are shown in Supplementary Table S2. Species name are represented in parentheses. The neighbor-joining tree is rooted with two vertebrate retroviruses, RSV and HIV1. Bootstrap values (out of 1000 replicates) are shown for branches with >50% support.

**Figure S5.** Genomic organization of LCA-EcoRIb and LCA-ApaI sequences. (A, B) Southern blot hybridization probed with LCA-EcoRIb (A) and LCA-ApaI (B) fragments. The *Le. camtschaticum* genomic DNA was digested with six restriction enzymes, AluI, ApaI, EcoRI, HpaII, MspI, and PstI. A mixture of  $\lambda$  DNA-HindIII and  $\phi$  X174 DNA-HaeIII digests was used as a molecular size marker.



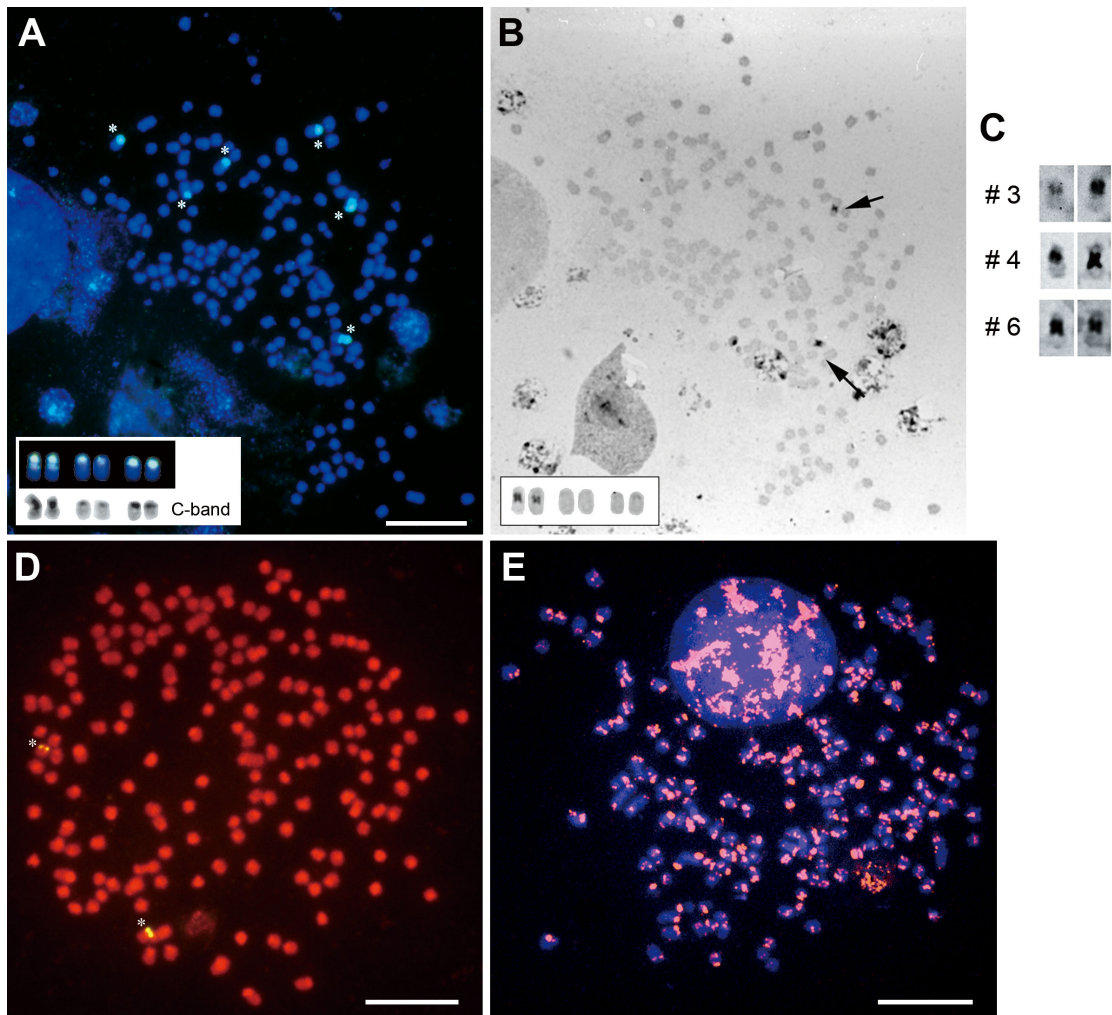

Figure S1.

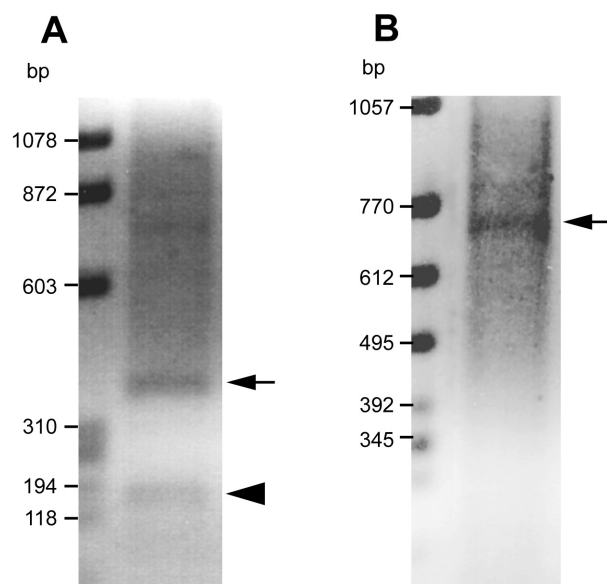

Figure S2.

**A**

|              |             |             |             |           |            |             |             |             |                  |
|--------------|-------------|-------------|-------------|-----------|------------|-------------|-------------|-------------|------------------|
|              | 10          | 20          | 30          | 40        | 50         | 60          | 70          | 80          | 90               |
| Consensus    | AATTCCTGA   | AGCTGGGAA   | ATCGCAATTT  | TTTGTGTGC | CAAATATCGT | ACGAACGTCA  | CGAACCTTCC  | ACACGCTTTT  | CCAGCAGATT       |
| LCA-EcoRIa1  | .....       | .....       | .....       | .....     | .....      | .....       | .....       | .....       | <u>.G.</u> ..... |
| LCA-EcoRIa2  | .....       | .....       | .....       | .....     | .....      | .....       | .....G..... | .....G..... | .....            |
| LCA-EcoRIa4  | .....       | .....       | .....       | .....     | .....      | .....       | .....       | .....       | .....            |
| LCA-EcoRIa6  | .....       | .....       | .....       | .....     | .....      | .....       | .....G..... | .....G..... | .....            |
| LCA-EcoRIa8  | .....G..... | .....C..... | ..A...TCA.. | A.A.....  | .....      | .....T..... | .....       | .....       | .....            |
| LCA-EcoRIa9  | .....G..... | .....C..... | ..A...TCA.. | A.A.....  | .....      | .....T..... | .....       | .....       | .....            |
| LCA-EcoRIa10 | .....       | .....       | .....       | .....     | .....      | .....       | .....       | .....       | .....            |
| LCA-EcoRIa11 | .....       | .....C..... | .....       | .....     | .....      | .....       | .....G..... | .....G..... | .....            |
| LCA-EcoRIa12 | .....       | .....       | .....       | .....     | .....      | .....       | .....       | .....       | .....            |

  

|              |            |           |               |            |             |             |            |            |             |
|--------------|------------|-----------|---------------|------------|-------------|-------------|------------|------------|-------------|
|              | 100        | 110       | 120           | 130        | 140         | 150         | 160        | 170        | 180         |
| Consensus    | TGCTCGTGCA | CAAAAAAAG | TCAAAATTT-    | TTACACATAG | ACCCC-ATCA  | AACGGTAGAA  | ATTGGCCGGG | ATTGCTCTCA | TGTGCGTTAC  |
| LCA-EcoRIa1  | .....      | .....     | .....C.G..... | .....      | .....       | .....       | .....      | .....      | .....       |
| LCA-EcoRIa2  | .....      | .....     | .....-        | .....      | .....       | .....T..... | .....      | .....      | .....       |
| LCA-EcoRIa4  | .....      | .....     | .....-        | .....      | .....       | .....       | .....      | .....      | .....G..... |
| LCA-EcoRIa6  | .....      | .....     | .....-        | .....      | .....       | .....T..... | .....      | .....      | .....       |
| LCA-EcoRIa8  | .....      | .....     | .....-        | .....      | .....       | .....       | .....      | .....      | .....       |
| LCA-EcoRIa9  | .....      | .....     | .....-        | .....      | .....       | .....       | .....      | .....      | .....       |
| LCA-EcoRIa10 | .....      | .....     | .....-        | .....      | .....       | .....       | .....      | .....      | .....       |
| LCA-EcoRIa11 | .....      | .....     | .....-        | .....      | .....C..... | .....       | .....      | .....      | .....       |
| LCA-EcoRIa12 | .....      | .....     | .....-        | .....      | .....       | .....       | .....      | .....      | .....C..... |

  

|              |               |             |       |     |
|--------------|---------------|-------------|-------|-----|
|              | 190           | 200         |       |     |
| Consensus    | GGGGCCTC-G    | TTTCTCTCGC  | TCCG  | 200 |
| LCA-EcoRIa1  | .....C.A..... | .....T..... | ..... | 202 |
| LCA-EcoRIa2  | .....-        | .....       | ..... | 200 |
| LCA-EcoRIa4  | .....GT.....  | ..CT.....   | ..... | 201 |
| LCA-EcoRIa6  | .....-        | .....       | ..... | 200 |
| LCA-EcoRIa8  | .....-        | .....       | ..... | 200 |
| LCA-EcoRIa9  | .....-        | .....       | ..... | 200 |
| LCA-EcoRIa10 | .....-        | .....       | ..... | 200 |
| LCA-EcoRIa11 | .....-        | .....       | ..... | 201 |
| LCA-EcoRIa12 | .....-        | .....       | ..... | 200 |

Figure S3A.

**B**

|              |            |            |            |           |            |            |            |           |           |
|--------------|------------|------------|------------|-----------|------------|------------|------------|-----------|-----------|
|              | 10         | 20         | 30         | 40        | 50         | 60         | 70         | 80        | 90        |
| Consensus    | AATTCTACTC | GCCTGGACGA | GCGGAATTGA | ATGGTGAAC | TGGTTTTGCT | GTGCTGTGTT | AAATCAGATA | TTTCATGAC | TGCATGTGA |
| LCA-EcoRIb1  | .....      | .....      | .....      | .....     | .....      | .....      | .....      | .....     | .....     |
| LCA-EcoRIb2  | .....      | .....      | .....      | .....     | .....      | .....      | .....      | .....     | .....     |
| LCA-EcoRIb3  | .....      | .....      | .....      | .....     | .....      | .....      | .....      | .....     | .....     |
| LCA-EcoRIb4  | .....      | .....      | .....      | .....     | .....      | .....      | .....      | .....     | .....     |
| LCA-EcoRIb6  | .....      | .....      | .....      | .....     | .....      | .....      | .....      | .....     | .....     |
| LCA-EcoRIb7  | .....      | .....      | .....      | .....     | .....      | .....      | .....      | .....     | .....     |
| LCA-EcoRIb8  | .....      | .....      | .....      | .....     | .....      | .....      | .....      | .....     | .....     |
| LCA-EcoRIb9  | .....      | .....      | .....      | .....     | .....      | .....      | .....      | .....     | .....     |
| LCA-EcoRIb10 | .....      | .....      | .....      | .....     | .....      | .....      | .....      | .....     | .....     |
| LCA-EcoRIb11 | .....      | .....      | .....      | .....     | .....      | .....      | .....      | .....     | .....     |
| LCA-EcoRIb12 | .....      | .....      | .....      | .....     | .....      | .....      | .....      | .....     | .....     |

|              |           |            |            |           |            |            |            |            |            |
|--------------|-----------|------------|------------|-----------|------------|------------|------------|------------|------------|
|              | 100       | 110        | 120        | 130       | 140        | 150        | 160        | 170        | 180        |
| Consensus    | TTATTTGAG | AATAGCAAAA | AACCGTCACC | CCCATATAC | ATAGTGTGTT | ATTGGTCGCT | CGTCTATTTC | ACTTCCCACA | GCTTAACCAC |
| LCA-EcoRIb1  | .....     | .....      | .....      | .....     | .....      | .....      | .....      | .....      | .....      |
| LCA-EcoRIb2  | .....     | .....      | .....      | .....     | .....      | .....      | .....      | .....      | .....      |
| LCA-EcoRIb3  | .....     | .....      | .....      | .....     | .....      | .....      | .....      | .....      | .....      |
| LCA-EcoRIb4  | .....     | .....      | .....      | .....     | .....      | .....      | .....      | .....      | .....      |
| LCA-EcoRIb6  | .....     | .....      | .....      | .....     | .....      | .....      | .....      | .....      | .....      |
| LCA-EcoRIb7  | .....     | .....      | .....      | .....     | .....      | .....      | .....      | .....      | .....      |
| LCA-EcoRIb8  | .....     | .....      | .....      | .....     | .....      | .....      | .....      | .....      | .....      |
| LCA-EcoRIb9  | .....     | .....      | .....      | .....     | .....      | .....      | .....      | .....      | .....      |
| LCA-EcoRIb10 | .....     | .....      | .....      | .....     | .....      | .....      | .....      | .....      | .....      |
| LCA-EcoRIb11 | .....     | .....      | .....      | .....     | .....      | .....      | .....      | .....      | .....      |
| LCA-EcoRIb12 | .....     | .....      | .....      | .....     | .....      | .....      | .....      | .....      | .....      |

|              |            |            |            |            |           |            |            |            |            |
|--------------|------------|------------|------------|------------|-----------|------------|------------|------------|------------|
|              | 190        | 200        | 210        | 220        | 230       | 240        | 250        | 260        | 270        |
| Consensus    | TCATATATTT | TGATGCCGCT | CGACGAGGCG | AGTAGTACGA | GTACCCCTT | GATGAGTCTG | CGACTATTCC | ATCCAGAGTT | ATTGTCAAAA |
| LCA-EcoRIb1  | .....      | .....      | .....      | .....      | .....     | .....      | .....      | .....      | .....      |
| LCA-EcoRIb2  | .....      | .....      | .....      | .....      | .....     | .....      | .....      | .....      | .....      |
| LCA-EcoRIb3  | .....      | .....      | .....      | .....      | .....     | .....      | .....      | .....      | .....      |
| LCA-EcoRIb4  | .....      | .....      | .....      | .....      | .....     | .....      | .....      | .....      | .....      |
| LCA-EcoRIb6  | .....      | .....      | .....      | .....      | .....     | .....      | .....      | .....      | .....      |
| LCA-EcoRIb7  | .....      | .....      | .....      | .....      | .....     | .....      | .....      | .....      | .....      |
| LCA-EcoRIb8  | .....      | .....      | .....      | .....      | .....     | .....      | .....      | .....      | .....      |
| LCA-EcoRIb9  | .....      | .....      | .....      | .....      | .....     | .....      | .....      | .....      | .....      |
| LCA-EcoRIb10 | .....      | .....      | .....      | .....      | .....     | .....      | .....      | .....      | .....      |
| LCA-EcoRIb11 | .....      | .....      | .....      | .....      | .....     | .....      | .....      | .....      | .....      |
| LCA-EcoRIb12 | .....      | .....      | .....      | .....      | .....     | .....      | .....      | .....      | .....      |

|              |            |             |            |            |            |            |            |            |            |
|--------------|------------|-------------|------------|------------|------------|------------|------------|------------|------------|
|              | 280        | 290         | 300        | 310        | 320        | 330        | 340        | 350        | 360        |
| Consensus    | AACCACAAAC | ATCCCAGAAAT | CCTCTTCGTT | TGGGGTCCAA | ATGTTGTCGC | TTATTATATC | CCATAAGAAA | CGTCGCATCG | AATCAATGTA |
| LCA-EcoRIb1  | .....      | .....       | .....      | .....      | .....      | .....      | .....      | .....      | .....      |
| LCA-EcoRIb2  | .....      | .....       | .....      | .....      | .....      | .....      | .....      | .....      | .....      |
| LCA-EcoRIb3  | .....      | .....       | .....      | .....      | .....      | .....      | .....      | .....      | .....      |
| LCA-EcoRIb4  | .....      | .....       | .....      | .....      | .....      | .....      | .....      | .....      | .....      |
| LCA-EcoRIb6  | .....      | .....       | .....      | .....      | .....      | .....      | .....      | .....      | .....      |
| LCA-EcoRIb7  | .....      | .....       | .....      | .....      | .....      | .....      | .....      | .....      | .....      |
| LCA-EcoRIb8  | .....      | .....       | .....      | .....      | .....      | .....      | .....      | .....      | .....      |
| LCA-EcoRIb9  | .....      | .....       | .....      | .....      | .....      | .....      | .....      | .....      | .....      |
| LCA-EcoRIb10 | .....      | .....       | .....      | .....      | .....      | .....      | .....      | .....      | .....      |
| LCA-EcoRIb11 | .....      | .....       | .....      | .....      | .....      | .....      | .....      | .....      | .....      |
| LCA-EcoRIb12 | .....      | .....       | .....      | .....      | .....      | .....      | .....      | .....      | .....      |

|              |       |     |
|--------------|-------|-----|
| Consensus    | ATTG  | 364 |
| LCA-EcoRIb1  | ..... | 364 |
| LCA-EcoRIb2  | ..... | 364 |
| LCA-EcoRIb3  | ..... | 364 |
| LCA-EcoRIb4  | ..... | 364 |
| LCA-EcoRIb6  | ..... | 364 |
| LCA-EcoRIb7  | ..... | 364 |
| LCA-EcoRIb8  | ..... | 364 |
| LCA-EcoRIb9  | ..... | 364 |
| LCA-EcoRIb10 | ..... | 364 |
| LCA-EcoRIb11 | ..... | 364 |
| LCA-EcoRIb12 | ..... | 364 |

Figure S3B.

**C**

```

          10      20      30      40      50      60      70      80      90
Consensus  CATTTCGCCG CACCCCCAGG GGCAATAGGT ATTTGTTGAC AGGTGTCGAG TATTTTACGC GCTGGCCTAT GGCCTGGCCC CTTGCCAACC
LCA-Apa11  .....
LCA-Apa12  .....C.....T.....A.....C.....
LCA-Apa13  .....C.....A.....C.....
LCA-Apa14  .....T.....A.....A.....
LCA-Apa15  .....G.....
LCA-Apa16  .....A.....T.....G.....A.....A.....
LCA-Apa17  .....C.....A.....C.....

          100     110     120     130     140     150     160     170     180
Consensus  AGTGGCAGC AGCCATCGTG GAGGCCTTGT TTCAGGGATA CGTCCTGGAC AAAGGTGCTC CCGAGCGGCT GCTGACCCGAC CAGGGCAGAA
LCA-Apa11  .....
LCA-Apa12  .....C.....A.....T.....A.....
LCA-Apa13  .....C.....A.....T.....A.....
LCA-Apa14  .....
LCA-Apa15  .....A..A.....A.....
LCA-Apa16  .....A..A..A.....A.....
LCA-Apa17  .....C.....A.....T.....A.....

          190     200     210     220     230     240     250     260     270
Consensus  ATTTTCCAG TAAATTACTC AAACAAGTCT GTGACCTCTT AGGCACGAAG AAAATTCGTA CCTCCCGGTA TCACCCGCAA ACTGACGGAA
LCA-Apa11  .....G.....CG.....G.....A..G.....C.....G.....
LCA-Apa12  .....A..C.....T.....A.....G.....A..G.....C.....
LCA-Apa13  .....C.....T.....A.....G.....A..G.....T.....
LCA-Apa14  .....TG.....C.....
LCA-Apa15  .....G.....
LCA-Apa16  .....G.....G.....C.....
LCA-Apa17  .....A..C.....G..T.....A.....G.....A.....

          280     290     300     310     320     330     340     350     360
Consensus  TGGTCGAGCG CCTGCATCGC ACCATTACGT CAATGATGTC ACAGCAGGTC TCGGACTCAC AGACTGACTG GGACCTGCAT ATTCAAGGGG
LCA-Apa11  .....
LCA-Apa12  .....T.....T.....A..T..T.....T.....G.....
LCA-Apa13  .....T.....T.....G.....A..T.....T.....G.....
LCA-Apa14  .....
LCA-Apa15  .....T.....G.....
LCA-Apa16  .....C.....
LCA-Apa17  .....T.....G.....A..T..T.....T.....G.....

          370     380     390     400     410     420     430     440     450
Consensus  TCTTGGCGGC ATACCCGATG GCACCCCATG CAGCTACGGG ATTTTCCCCC TTTTACCTCA TGTACGGTGC CGAACCCGAC CCGCCTGTTC
LCA-Apa11  .....
LCA-Apa12  .....
LCA-Apa13  .....
LCA-Apa14  .....
LCA-Apa15  .....
LCA-Apa16  .....
LCA-Apa17  .....

          460     470     480     490     500     510     520     530     540
Consensus  GCGCCCAGCT GCAGATCCCC GAGCCGCAAG GGAAAACTAA ATTTGGCTGAC CACGTCAAAT TTAATCTGGC CAAATTAACA GAGGCGCGGG
LCA-Apa11  .....
LCA-Apa12  .....C.....A.....T.....
LCA-Apa13  .....C.....A.....T.....
LCA-Apa14  .....
LCA-Apa15  .....C.....
LCA-Apa16  .....
LCA-Apa17  .....C.....A.....T.....

          550     560     570     580     590     600     610     620     630
Consensus  ATGCTGCAAT GCTAAACTCG GACCTCCGTC AAAAGGCGAA TGAGCGCCTC AGGCTGGGTC GGGCGCACAT AATACAGTGG AAGCCGGGGG
LCA-Apa11  .....G.....
LCA-Apa12  .....G..G..T.G.....C.....TG.....A.....
LCA-Apa13  .....G..G..T.G.....A.....C.....TG.....A.....
LCA-Apa14  .....T.....T.....T.....T.....G.....
LCA-Apa15  .....T.....G.....
LCA-Apa16  .....G.....
LCA-Apa17  .....G..G..T.G.....C.....TG.....A.....

          640     650     660     670     680     690     700
Consensus  ACAAGGCATG GTTGCACTGT CCCCAGTGC CACTGGCTAC CTCCTCTAAG CTGGTGGCGC CGTGGCGGGG CC
LCA-Apa11  .....C.....
LCA-Apa12  .....G.....A.....C.....C.....C.....
LCA-Apa13  .....G.....A.....C.....C.....
LCA-Apa14  .....C.....C.....
LCA-Apa15  .....C.....C.....C.....
LCA-Apa16  .....C.....C.....A.....
LCA-Apa17  .....G.....A.....C.....C.....C.....C.....

```

Figure S3C.

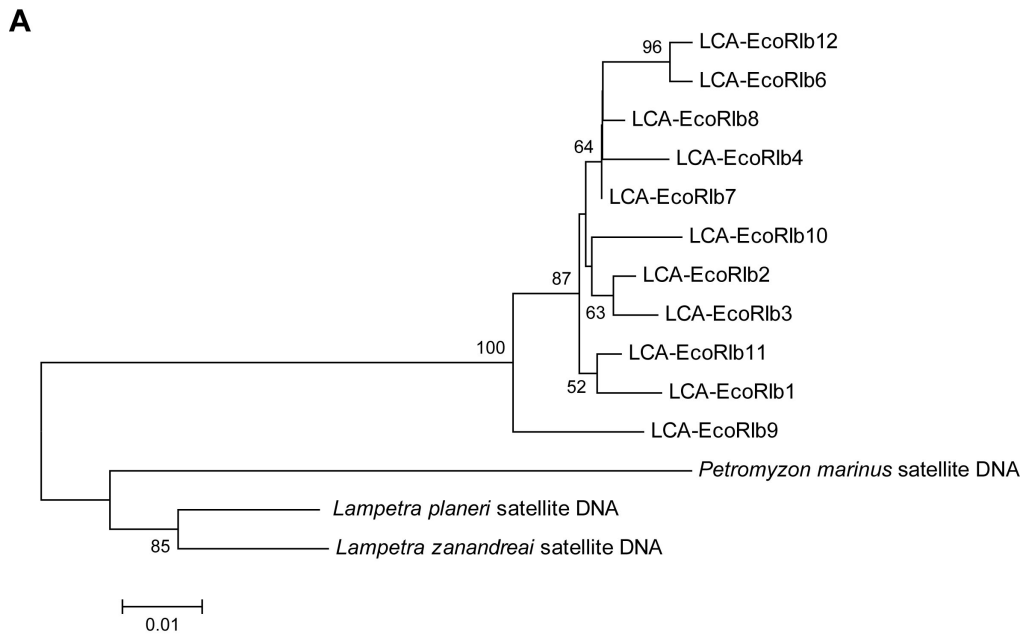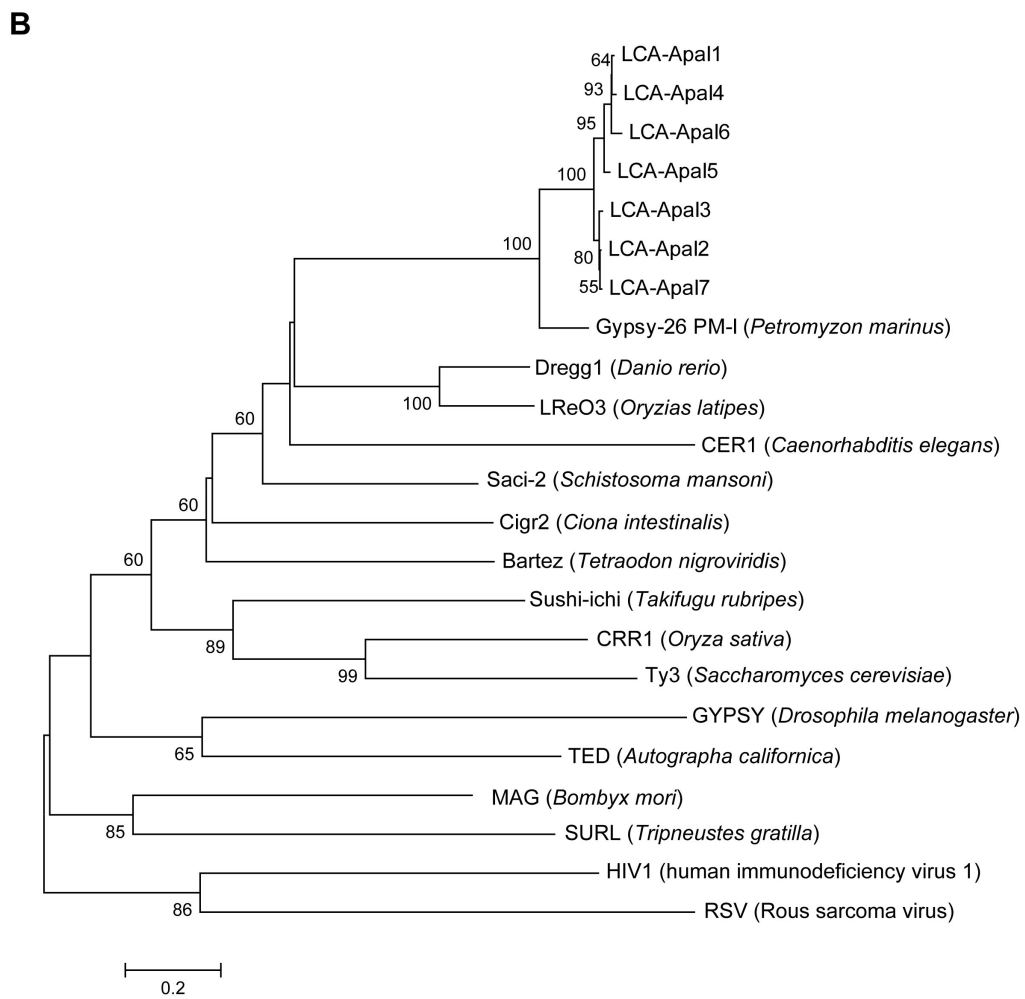

Figure S4.

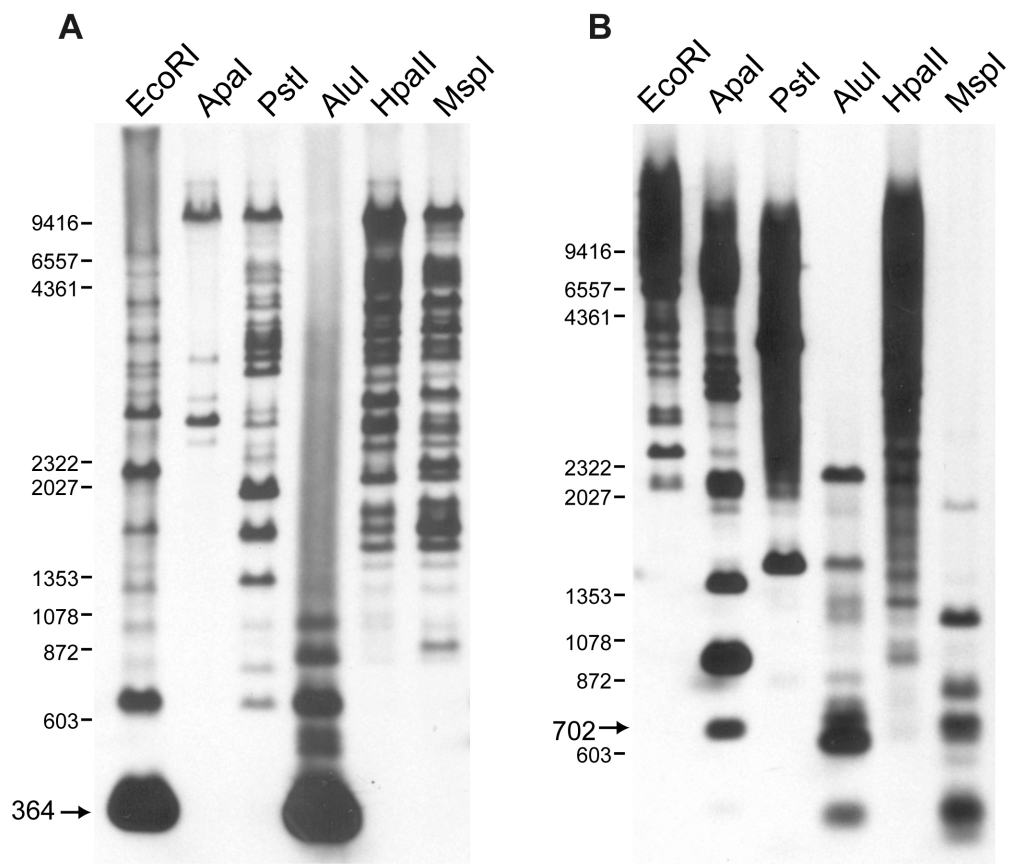

Figure S5.
